# Supplementary material for: What Can We Expect for the Development of Rural Areas in Europe?—Trends of the Last Decade and Their Opportunities for Rural Regeneration
Source: MDPI journal article supplement (doi:10.3390/su15065485), 2023-03-20
Supplement: s1 [file s1]

Archive with 1 entries (1 files):
- sustainability-2243582-supplementary.pdf
