# Supplementary material for: What Can We Expect for the Development of Rural Areas in Europe?—Trends of the Last Decade and Their Opportunities for Rural Regeneration
Source: MDPI journal article supplement (doi:10.3390/su15065485), 2023-03-20
Supplement: s1 [file s1 › sustainability-2243582-supplementary.pdf]

## Supplementary Materials

**Table S1.** EU-Project reports.

| <b>EU-Project Reports</b>                                                                                                                                                 | <b>No. of Trend-Observations</b> | <b>Year (Source)</b> |
|---------------------------------------------------------------------------------------------------------------------------------------------------------------------------|----------------------------------|----------------------|
| Possible European Territorial Futures. Final Report; Executive Summary.                                                                                                   | 69                               | 2018                 |
| A Territorial Reference Framework for Europe.                                                                                                                             | 53                               | 2019                 |
| RUSELDA - Rural Sustainable Development for local Decision makers.                                                                                                        | 24                               | 2018                 |
| Study on Employment, Growth and Innovation in Rural Areas (SEGIRA).                                                                                                       | 24                               | 2010                 |
| FARMPATH - Farming Transitions: Pathways Towards Regional Sustainability of Agriculture in Europe. Final Report Summary.                                                  | 16                               | 2014                 |
| Evaluation of the impact of the CAP on generational renewal, local development and jobs in rural areas.                                                                   | 15                               | 2019                 |
| PLUREL. Peri-Urbanisation in Europe: Towards European Policies to Sustain Urban-Rural Futures.                                                                            | 15                               | 2011                 |
| NEWBIE. New Entrant network.                                                                                                                                              | 14                               | 2018                 |
| EDORA: European Development Opportunities for Rural Areas. Applied Research 2013/1/2.                                                                                     | 14                               | 2011                 |
| Cohesion Policy for rural areas after 2013. A rationale derived from the EDORA project (European Development Opportunities in Rural Areas) – ESPON 2013 Project 2013/1/2. | 13                               | 2011                 |
| ROBUST. Interactions and dependencies between rural, peri-urban and urban areas and contemporary governance approaches.                                                   | 12                               | 2018                 |
| ENDURE foresight study. European Crop Protection in 2030.                                                                                                                 | 12                               | 2010                 |
| Smart-AKIS Policy Gaps and Briefs.                                                                                                                                        | 11                               | 2018                 |
| PURR Potentials of Rural Regions. Final Report.                                                                                                                           | 11                               | 2012                 |
| RuralJobs.                                                                                                                                                                | 11                               | 2010                 |
| ESPON ESCAPE European Shrinking Rural Areas. Challenges, Actions and Perspectives for Territorial Governance.                                                             | 10                               | 2019                 |
| SIMRA. Social Innovation in Marginalised Rural Areas.                                                                                                                     | 10                               | 2019                 |
| TRUSTEE - Towards Rural Synergies and Trade-offs between Economic development and Ecosystem services. Final report.                                                       | 10                               | 2017                 |
| AgriSPIN D1.3: Synthesis report on selected and documented innovation cases for Cross Visits.                                                                             | 10                               | 2016                 |
| BRIDGES - Territories with Geographical Specificities. Balanced Regional Development in areas with Geographic Specificities.                                              | 9                                | 2018                 |
| Valorising European Research for Innovation in Agriculture and Forestry. FINAL REPORT – VALERIE: access to knowledge for innovation in agriculture and forestry.          | 9                                | 2017                 |
| Europe's new farmers. Innovative ways to enter farming and access land.                                                                                                   | 8                                | 2018                 |
| Shrinking rural regions in Europe. Towards smart and innovative approaches to regional development challenges in depopulating rural regions.                              | 8                                | 2017                 |

|                                                                                                                                                                                                                                 |   |      |
|---------------------------------------------------------------------------------------------------------------------------------------------------------------------------------------------------------------------------------|---|------|
| THE HNV LINK ATLAS. Crossed perspectives on 10 learning areas - Understanding the field of play for High Nature Value innovation projects.                                                                                      | 8 | 2017 |
| Access to land: Learning Plattform. Learning towards Access to Land. Project Summary.                                                                                                                                           | 7 | 2019 |
| PLAID Peer-to-Peer Learning: Accessing innovation through demonstration. Final Dissemination Report.                                                                                                                            | 7 | 2019 |
| RURINNO. Rural Social Enterprises: Experiences from the field: An experimental report created by practitioners, for practitioners, in the field of social enterprise.                                                           | 7 | 2018 |
| TRANSMANGO. Final Report Summary.                                                                                                                                                                                               | 7 | 2018 |
| FEAL multifunctional Farming for the sustainability of European Agricultural Landscapes. Situationsbericht zur Beziehung zwischen nachhaltigen / multifunktionalen Landwirtschaftspraktiken und europäischen Agrarlandschaften. | 7 | 2017 |
| The Volante Roadmap. Towards Sustainable Land Resource Management in Europe.                                                                                                                                                    | 7 | 2015 |
| LIVERUR. Living Lab Research concept in rural Areas.                                                                                                                                                                            | 6 | 2019 |
| SALSA. Small Farms, Small Food Businesses and Sustainable Food Security.                                                                                                                                                        | 6 | 2019 |
| PEGASUS - Public Ecosystem Goods and Services from land management – Unlocking the Synergies. Working Together to Build a Successful Initiative - THE PEGASUS TOOLKIT.                                                          | 6 | 2018 |
| The Geography of New Employment Dynamics in Europe. Executive Summary.                                                                                                                                                          | 6 | 2017 |
| Pilot project - Exchange programmes for young farmers. Executive Summary.                                                                                                                                                       | 6 | 2015 |
| RURAGRI. Facing sustainability: new relationships between rural areas and agriculture in Europe.                                                                                                                                | 6 | 2014 |
| RURBAN. Rural-Urban Partnerships. An Integrated Approach to Economic Development: OECD.                                                                                                                                         | 6 | 2013 |
| RUMORE. Rural-Urban Partnerships Motivating Regional Economies.                                                                                                                                                                 | 5 | 2019 |
| AGRIFORVALOR. Bringing added value to agriculture and forest sectors by closing the research and innovation divide.                                                                                                             | 5 | 2018 |
| Young farmers in the EU – structural and economic characteristics (EU Agricultural and Farm Economics Briefs, 15).                                                                                                              | 5 | 2017 |
| EIP-AGRI Focus Group - New entrants into farming: lessons to foster innovation and entrepreneurship. FINAL REPORT.                                                                                                              | 5 | 2016 |
| SIESTA Spatial Indicators for a 'Europe 2020 Strategy' Territorial Analysis.                                                                                                                                                    | 5 | 2013 |
| DERREG. Developing Europe's Rural Regions in the Era of Globalisation: An Interpretative Model for Better Anticipating and Responding to Challenges for Regional Development in an Evolving International Context.              | 5 | 2011 |
| RUFUS. Rural Future Networks.                                                                                                                                                                                                   | 5 | 2011 |
| ORGANICDATANETWORK - Data network for better European organic market information. Final Report Summary.                                                                                                                         | 4 | 2014 |
| MIGRARE – Impacts of refugee flows to territorial development in Europe. Final Report.                                                                                                                                          | 3 | 2019 |

|                                                                                                                                                                                                              |   |      |
|--------------------------------------------------------------------------------------------------------------------------------------------------------------------------------------------------------------|---|------|
| RELOCAL. Resituating the Local in Cohesion and Territorial Development.                                                                                                                                      | 3 | 2019 |
| AGFORWARD PROJECT FINAL REPORT.                                                                                                                                                                              | 3 | 2018 |
| INNOGROW. Regional policies for innovation driven competitiveness and growth of rural SMEs.                                                                                                                  | 3 | 2017 |
| The future of food and agriculture. Trends and challenges.                                                                                                                                                   | 3 | 2017 |
| COFARM. Zusammenfassender Bericht.                                                                                                                                                                           | 3 | 2016 |
| Suburb Food. FINAL REPORT WP6 - AN EXPLORATION OF MULTI-FUNCTIONALITY IN URBAN FOOD INITIATIVES.                                                                                                             | 3 | 2015 |
| Rubizmo. Replicable business models for modern rural economies.                                                                                                                                              | 2 | 2019 |
| IMAJINE. Integrative Mechanisms for Addressing Spatial Justice and Territorial Inequalities in Europe.                                                                                                       | 2 | 2017 |
| Farm-Success. training farmers for sustainable succession processes.                                                                                                                                         | 2 | 2016 |
| TURAS - Transitioning towards Urban Resilience and Sustainability. PROJECT FINAL REPORT.                                                                                                                     | 2 | 2016 |
| PUREFOOD. Urban, peri-urban and regional food dynamics: toward an integrated and territorial approach to food.                                                                                               | 2 | 2014 |
| PRIMA. Prototypical Policy Impacts on Multifunctional Activities in rural municipalities.                                                                                                                    | 2 | 2012 |
| AFINET. Agroforestry Innovation Networks.                                                                                                                                                                    | 1 | 2019 |
| LIASON: Better Rural Innovation: Linking Actors, Instruments and Policies through Networks. D6.1: Discussion Paper 'Challenges Innovation Actors are Facing, and the Related Research and Innovation Needs'. | 1 | 2019 |
| YUTRENDS – Youth unemployment: Territorial trends and regional resilience.                                                                                                                                   | 1 | 2019 |
| Small and Medium-Sized Enterprises in European Regions and Cities. Final Report.                                                                                                                             | 1 | 2018 |
| SCENAR 2030. Pathways for the European agriculture and food sector beyond 2020.                                                                                                                              | 1 | 2017 |
| MULTAGRI. Policy Brief 02/2016: Impact of the CAP's environmental policy instruments on farm structures, agricultural incomes and public goods.                                                              | 1 | 2016 |
| TENLAW - Tenancy Law and Housing Policy in Multi-level Europe. Final Report Summary.                                                                                                                         | 1 | 2016 |
| IAREG. Intangible Assets and Regional Economic Growth.                                                                                                                                                       | 1 | 2010 |
| The Use of Conservation Easements in the European Union. Report to NABU Federal Association.                                                                                                                 | 0 | 2018 |
| DIVERCITIES - Governing Urban Diversity: Creating Social Cohesion, Social Mobility and Economic Performance in Today's Hyperdiversified Cities. Final Report Summary.                                        | 0 | 2017 |
| CHANCE2SUSTAIN. Urban Chances: City growth and the sustainability challenge; Comparing fast growing cities in growing economies.                                                                             | 0 | 2014 |
| SPARD. Spatial Analysis of Rural Development Measures.                                                                                                                                                       | 0 | 2013 |
| RUDI. Assessing the impact of rural development policies.                                                                                                                                                    | 0 | 2010 |

**Table S2.** Content summary of all trends and drivers sorted by topics.

| <b>Trends and Drivers that Touches all Systems (120)</b>                    |                                                                                                                                                                                                                                                                     |                                                                                                                                                                                                                                                                                                                                                                                                     |                                                                                                                                                                                                                                                                                                                                                                                                                                                                                                                                   |
|-----------------------------------------------------------------------------|---------------------------------------------------------------------------------------------------------------------------------------------------------------------------------------------------------------------------------------------------------------------|-----------------------------------------------------------------------------------------------------------------------------------------------------------------------------------------------------------------------------------------------------------------------------------------------------------------------------------------------------------------------------------------------------|-----------------------------------------------------------------------------------------------------------------------------------------------------------------------------------------------------------------------------------------------------------------------------------------------------------------------------------------------------------------------------------------------------------------------------------------------------------------------------------------------------------------------------------|
| <b>Trend<br/>(Type/Number of<br/>Observations)</b>                          | <b>Main Drivers</b>                                                                                                                                                                                                                                                 | <b>General Developments</b>                                                                                                                                                                                                                                                                                                                                                                         | <b>Chances</b>                                                                                                                                                                                                                                                                                                                                                                                                                                                                                                                    |
| <b>Unequal development and inequality<br/>(Megatrend / 40)</b>              | Economy: globalization<br>Economy: market liberalization<br>Regional development: rural decline                                                                                                                                                                     | Growing disparities within the EU<br>Increasing inequality between urban and rural areas in all domains (economically, politically and social)<br>Higher unemployment rates in rural areas (especially in remote rural areas)<br>Lower educational level of the rural population (especially in remote rural areas)                                                                                 | The debate about inequalities is getting more and more present, which could lead to more redistribution policies in the nation states and the EU<br>Often rural areas do not scoop out their whole potential that opens the opportunity for place-based strategies to increase the socio-economic environment<br>New forms of lifestyle and digitalization could help to make rural areas more attractive if physical and digital accessibility increases in those affected areas                                                 |
| <b>The decline of rural services and accessibility<br/>(Megatrend / 21)</b> | Rural services: decline or poor status of public services and infrastructures<br>Policy: rural and regional policies + decline or poor status of public services and infrastructures<br>Regional development: community cooperation and development + rural decline | Decreasing quality of accessibility<br>Decreasing quality of infrastructure:<br>Growing mismatch between the supply and demand of SGI<br>Shift away from a “welfare state” ethos towards market-based supply that leads to a reduction of SGI’s like education, health, or social services<br>Proximity to urban areas appears to be an important factor for rural areas<br>Increasing public debts | Proximity to urban areas appears to be an important factor for rural areas, so those rural areas close to cities might use urban-rural networks<br>Remote rural areas are forced to use factors besides proximity to be successful, but therefore potentials in sustainable landscapes, tourism, and attractive environment have to be harvested and used and digital infrastructure has to be provided on a high level<br>The debate around EU-Cohesion policies can lead to more focus on the development of remote rural areas |
| <b>Rural decline<br/>(Megatrend / 19)</b>                                   | Economy: globalization<br>Economy: market liberalization<br>Demographics: demographic change                                                                                                                                                                        | Population declines and aging lead to rural shrinkage (especially in remote rural areas in Eastern Europe)<br>Loss of quality of life, due to loss of social and cultural capital<br>Loss of employment opportunities in rural areas<br>Current welfare policies do not stop the current downward spiral in remote rural areas                                                                      | Establishing new forms of economies that adapt to the demographic change (e.g., silver economy or health tourism)<br>Using the shift in the political debate from neoliberal topics towards a more sustainable welfare policy to strengthen socioeconomic structure of remote rural areas                                                                                                                                                                                                                                         |
| <b>Climate change<br/>(Megatrend / 17)</b>                                  | Economy: industrialization<br>Economy: increase in consumption<br>Economy: fossil economy<br>Mobility and traffic: increasing traffic and mobility                                                                                                                  | The trend can be described as a megatrend that effect more or less all different kind of countries, areas and domains in the whole world<br>Higher average temperature and increasing environmental risks<br>Reduction of biodiversity and agricultural land                                                                                                                                        | Rural areas play a major role regarding the reduction of CO-2 emissions, which could be used to enforce a Realization-process towards a divers and sustainable economy<br>Environmental policies that can be expected in the future within the EU can lead to many opportunities in rural spaces regarding sustainable agriculture and the production of sustainable energy<br>A possible promotion of short supply-chains might strengthen local economies<br>Rural areas can profit from climate-orientated subsidies           |
| <b>Exploitation of development potential</b>                                | Economy: globalization                                                                                                                                                                                                                                              | Core challenges in rural areas: social cohesion, competitiveness, sustainability and food security                                                                                                                                                                                                                                                                                                  | Activities such as sustainable organic agriculture or short value chains, community tourism and                                                                                                                                                                                                                                                                                                                                                                                                                                   |

|                                                                                                                        |                                                                                                                                                                      |                                                                                                                                                                                                                                                                                                                                                                                                                                                                                                                            |                                                                                                                                                                                                                                                                                                                                                                                                                                                                          |
|------------------------------------------------------------------------------------------------------------------------|----------------------------------------------------------------------------------------------------------------------------------------------------------------------|----------------------------------------------------------------------------------------------------------------------------------------------------------------------------------------------------------------------------------------------------------------------------------------------------------------------------------------------------------------------------------------------------------------------------------------------------------------------------------------------------------------------------|--------------------------------------------------------------------------------------------------------------------------------------------------------------------------------------------------------------------------------------------------------------------------------------------------------------------------------------------------------------------------------------------------------------------------------------------------------------------------|
| <b>(Trend / 13)</b>                                                                                                    | Governance:<br>lack of effective<br>governance<br>strategies<br>Values:<br>ecological and<br>social awareness<br>Technology:<br>technological<br>development         | Lack of human, technological and<br>financial capital in many rural areas<br>Not enough potential for social<br>engagement in rural areas                                                                                                                                                                                                                                                                                                                                                                                  | social inclusion aim to support the<br>sustainable socio-entrepreneurial<br>potential of local young people<br>Similar opportunities in Europe:<br>opportunities for fostering social<br>innovation and change, act as a<br>backdrop for engaged local people,<br>offering available venues that<br>provide physical and metaphorical<br>space for trying out novel<br>solutions, without the immediate<br>pressures of commercial viability                             |
| <b>Globalization<br/>(Megatrend / 10)</b>                                                                              | Economy:<br>globalization<br>Economy:<br>market<br>liberalization                                                                                                    | Market Liberalization, with<br>disadvantages (completion) and<br>advantages (Expanding export markets)<br>for rural areas<br>Internationalization of Agriculture as a<br>consequence of "open" rural economies<br>Current developments could lead to<br>more or less global trade (free-trade vs.<br>protectionism)<br>Current trends are leading to a<br>polarization of land functions in Europe,<br>a greening of marginal agricultural land,<br>and a displacement of food production<br>to other regions in the world | Access to the global market for<br>agricultural products or other<br>products from rural areas<br>Potential immigration from other<br>regions to stop population decline<br>in rural areas                                                                                                                                                                                                                                                                               |
| <b>Trends and Drivers in Agriculture and Farming (113)</b>                                                             |                                                                                                                                                                      |                                                                                                                                                                                                                                                                                                                                                                                                                                                                                                                            |                                                                                                                                                                                                                                                                                                                                                                                                                                                                          |
| <b>Trend<br/>(Type/Number of<br/>Observations)</b>                                                                     | <b>Main Drivers</b>                                                                                                                                                  | <b>General Developments</b>                                                                                                                                                                                                                                                                                                                                                                                                                                                                                                | <b>Chances</b>                                                                                                                                                                                                                                                                                                                                                                                                                                                           |
| <b>Specific agro-economic<br/>developments<br/>(Trend / 28)</b>                                                        | Economy:<br>globalization<br>Economy:<br>market<br>liberalization                                                                                                    | Rising competitiveness, although<br>agricultural production is characterized<br>by low competitiveness<br>Global Food markets with global<br>commodity chains<br>Problems of generational renewal of<br>farms, due to societal developments and<br>economic pressure on agricultural<br>production                                                                                                                                                                                                                         | Technological developments can<br>make the agricultural sector more<br>efficient and competitive<br>New forms of succession in<br>farming as opportunity for the<br>agricultural sector<br>New models of partnership in<br>farming (e.g., joint ventures and<br>land partnerships)                                                                                                                                                                                       |
| <b>Young farmers and<br/>new entrants<br/>(Trend / 25)</b>                                                             | Governance:<br>new modes and<br>lack of<br>effectiveness<br>Rising<br>educational<br>levels, skills and<br>competences<br>Drivers in<br>Economy, Farms<br>and Values | Only few young farmers / lacks of<br>generational renewal in agriculture<br>High barriers for new entrants in<br>farming (e.g., high start-up costs, lack of<br>financial support, lack of access to land)                                                                                                                                                                                                                                                                                                                 | Young farmers more often have<br>the highest professional level of<br>education<br>New forms of support for young<br>farmers and new entrants arise<br>from civil societies (e.g.,<br>community-supported<br>agriculture, integration of social<br>enterprises into farming, shared<br>farming)<br>Young farmers and new entrants<br>have a different view on<br>agricultural production, which can<br>help to renew the sector towards a<br>more sustainable production |
| <b>New types of<br/>farming<br/>(Trend / 12)</b>                                                                       | Economy:<br>globalization<br>Economy:<br>market<br>liberalization<br>Values:<br>ecological and<br>social awareness                                                   | Changes in agricultural production and<br>practices (more professional networks,<br>precision farming, etc.)<br>Rural agricultural economies often are<br>structured by small enterprises<br>Lack of access to educational and<br>technological innovations for farmers                                                                                                                                                                                                                                                    | Innovations in farming (e.g.,<br>precision farming, professional<br>forms of organization,<br>combination with other domains)<br>New forms of farming, that<br>integrate new forms of lifestyle,<br>technological innovations and<br>social engagement, could make it<br>more attractive to work in the<br>agricultural sector                                                                                                                                           |
| <b>Changing patterns<br/>of the employment<br/>in rural areas and<br/>the agricultural<br/>sector<br/>(Trend / 11)</b> | Regional<br>development:<br>rural decline<br>Technology:<br>automation,<br>robotization                                                                              | General shrinkage of labor force in the<br>primary sector, mainly because<br>agriculture is getting more economically<br>efficient and technologized<br>Lack of skilled human capital and<br>qualified labor force in rural areas                                                                                                                                                                                                                                                                                          | The rising number of immigrants<br>and outside commuters might fill<br>the gap of rural labor force                                                                                                                                                                                                                                                                                                                                                                      |

|                                                                |                                                                                                                            |                                                                                                                                                                                                                                                                                                                                                                             |                                                                                                                                                                                                                                                                                                                                                                                                      |                                                                                                                                                                                                                                                                            |
|----------------------------------------------------------------|----------------------------------------------------------------------------------------------------------------------------|-----------------------------------------------------------------------------------------------------------------------------------------------------------------------------------------------------------------------------------------------------------------------------------------------------------------------------------------------------------------------------|------------------------------------------------------------------------------------------------------------------------------------------------------------------------------------------------------------------------------------------------------------------------------------------------------------------------------------------------------------------------------------------------------|----------------------------------------------------------------------------------------------------------------------------------------------------------------------------------------------------------------------------------------------------------------------------|
|                                                                |                                                                                                                            | Governance: conflicts and governance failures<br>Economy: market liberalization                                                                                                                                                                                                                                                                                             |                                                                                                                                                                                                                                                                                                                                                                                                      |                                                                                                                                                                                                                                                                            |
| <b>Agroecology, Bio and Forest ecology (Trend / 9)</b>         |                                                                                                                            | Energy: growing energy demand<br>Drivers in Economy, Environment and Values                                                                                                                                                                                                                                                                                                 | Increase of sustainable forms in the primary sector (agriculture and forestry)<br>Increasing use of biomass to produce energy<br>Land competition between forest coverage and agriculture                                                                                                                                                                                                            | New forms of innovations that combine the primary sector with the use and production of biomass can be seen as economic chance for rural areas                                                                                                                             |
| <b>Farm size (Trend / 9)</b>                                   |                                                                                                                            | Economy: globalization<br>Demographics: demographic change                                                                                                                                                                                                                                                                                                                  | Decline in the number of farms: land concentration, agricultural holdings are increasing in size<br>Increasing number of large scaled commercialized and industrialized farms with heavy workload                                                                                                                                                                                                    | New forms of labor in the agricultural sector besides owning or managing a farm                                                                                                                                                                                            |
| <b>Aging and decrease of farm population (Trend / 8)</b>       |                                                                                                                            | Economy: globalization<br>Demographics: demographic change                                                                                                                                                                                                                                                                                                                  | The farming population ages and decrease (31 % of the farmers are older than 65 years, in 10 years more than half of the farming population in the EU retires)<br>Decline of family-farms and rising competition for land<br>Risky economic environment for famers in general (fluctuating prices, dependency on subsidies, increase of extreme weather events)                                      | The large numbers of retiring farmers can clear the way for a new young generation of famers that initiates a renewal towards a more sustainable agricultural sector in general                                                                                            |
| <b>Diversification and specialization of farms (Trend / 7)</b> |                                                                                                                            | Economy: empowerment of services<br>Economic drivers                                                                                                                                                                                                                                                                                                                        | Shift away from primary production towards a New Rural Economy<br>Combination of farming with non-agricultural activities, the production of renewable energy and biodiversity conservation<br>Diversification of farm income                                                                                                                                                                        | A diversified agricultural sector in combination with more sustainability can benefit from new environmental policies that can be expected in the future<br>Farmers with diver's economic activities helps smaller enterprises to sustain and strengthen the rural economy |
| <b>Farmland prices (Trend / 4)</b>                             |                                                                                                                            | Resource scarcity: scarcity of natural resources<br>Economy: globalization<br>Economy: market liberalization                                                                                                                                                                                                                                                                | High land prices, partly due to a lack of sufficient regulation of land concentration/speculation<br>Prices for land are very high, driven by high demand from investors, hobby farmers and existing farmers' intent on achieving economies of scale, and intensified by side-effects of tax and environmental legislation<br>Land competition is overlaid and intensified by increasing land prices | The negative developments in the land market might raise the pressure on policy makers to protect existing agricultural land structures or ensure small sustainable enterprises to be able to compete in the market                                                        |
| <b>Trends and Drivers in Economy and Technology (86)</b>       |                                                                                                                            |                                                                                                                                                                                                                                                                                                                                                                             |                                                                                                                                                                                                                                                                                                                                                                                                      |                                                                                                                                                                                                                                                                            |
| <b>Trend (Type/Number of Observations)</b>                     | <b>Main Drivers</b>                                                                                                        | <b>General Developments</b>                                                                                                                                                                                                                                                                                                                                                 |                                                                                                                                                                                                                                                                                                                                                                                                      | <b>Chances</b>                                                                                                                                                                                                                                                             |
| <b>Diversification of the rural economy (Megatrend / 14)</b>   | Economy: globalization<br>Economy: empowerment of services<br>Economy: market liberalization<br>Technology: digitalization | Structural change of the rural economy that leads to a more diverse sectoral structure of the economy in rural areas<br>Growing secondary and tertiary sectors in rural areas<br>The influence of agriculture in rural areas has declined while the importance of other activities (social innovations, tourism, transport, and increasingly, energy policy) has increased. |                                                                                                                                                                                                                                                                                                                                                                                                      | Using the socio-economic change to strengthen the economy in rural areas<br>Using opportunities that lay in consumption countryside and energy production to depend less on the agricultural sector, which is often still the case in remote rural areas in the EU         |

|                                                                |                                                                                                                                                        |                                                                                                                                                                                                                                                                                                                                                                                       |                                                                                                                                                                                                                                                                                                                                                                             |
|----------------------------------------------------------------|--------------------------------------------------------------------------------------------------------------------------------------------------------|---------------------------------------------------------------------------------------------------------------------------------------------------------------------------------------------------------------------------------------------------------------------------------------------------------------------------------------------------------------------------------------|-----------------------------------------------------------------------------------------------------------------------------------------------------------------------------------------------------------------------------------------------------------------------------------------------------------------------------------------------------------------------------|
| <b>Innovations and knowledge economy (Trend / 12)</b>          | Domain<br>Economy<br>Domain Science, education and knowledge<br>Domain Farms<br>Domain Technology                                                      | Rural areas have a deficit of knowledge, skill and technological development<br>Technological disruption in all services<br>New markets are rising, more innovation takes place and which leads to more competitiveness                                                                                                                                                               | Declining rural areas can use education and innovation to stop or reverse negative developments, but therefore economic actors have to be present<br>Some rural areas might develop clustered markets for innovative mixes                                                                                                                                                  |
| <b>Manifestations of new technologies (Trend / 12)</b>         | Technology: digitalization<br>Technology: technological development<br>Economy: globalization<br>Technology: automation, robotization                  | 4th industrial revolution (product design, use of big data, artificial intelligence, machine learning, internet of things)<br>Automation, Digitalization and Robotization<br>Lack of digitalization in agriculture                                                                                                                                                                    | Using new types of farming that result from automation, digitalization and robotization (e.g., precision farming) to evolve a highly effective sustainable farming<br>Using digitalization to enforce immigration in rural areas, because of the rising potential of remote work and digital jobs                                                                           |
| <b>Digital economy (Trend / 11)</b>                            | Technology: digitalization<br>Technology: technological development                                                                                    | Digitalization has many effects on rural development in general<br>New opportunities for agricultural production as well as selling food directly via e-commerce                                                                                                                                                                                                                      | E-Learning as a growing opportunity to decrease the number of early school leavers and raise educational level<br>Rural areas with a high level of digital accessibility can be very attractive for remote workers<br>Digital solutions can increase the service level in remote rural areas (e.g., service to people, provision of medical services via video conferences) |
| <b>Economic growth and market effects (Trend / 11)</b>         | Economy: globalization<br>Economy: market liberalization                                                                                               | The landscape for development finance is changing (growing influence of real estate markets)<br>Global economic growth while the growth of the developed economies in the EU slows down<br>Recent impacts of the global economic crisis on rural industry and employment<br>Decoupling between growth and jobs (for economic growth, high employment rates are not necessary anymore) | GDP grows faster in rural than in non-rural areas<br>Effective coordination and distribution between supply and consume of food can be a key in future<br>Using new economies and markets to develop rural areas                                                                                                                                                            |
| <b>Interdependency and interregional networks (Trend / 11)</b> | Economy: globalization<br>Technology: digitalization                                                                                                   | Territoriality will be disrupted by the increasing relevance of networks of relations overpassing borders<br>Growing interdependencies between places that lead to an increasing 'connexity' of rural economies<br>Economic sectors as well as urban and rural areas grow together                                                                                                    | Borderless local cooperation's are a chance for remote rural areas to grow independently from the next urban center<br>Increasing mixture in cultural dynamics between rural and urban sites might help to make rural areas more attractive for urban dwellers                                                                                                              |
| <b>Resource competition (Trend / 9)</b>                        | Economy: globalization<br>Environment: environmental degradation, pollution and risks<br>Economy: market liberalization<br>Environment: climate change | Growing demand on resources leads to a growing competition for natural resources<br>Water and food scarcity will also impact Europe<br>Lack of space for rural entrepreneurs                                                                                                                                                                                                          | New types of rural economies that function in a more resource-conserving way can lead to a rural regeneration on the basis of sustainability                                                                                                                                                                                                                                |

| <b>New forms of economies as chances for rural spaces (Trend / 6)</b>                          | Technology: digitalization<br>Values: ecological awareness                                                                                                                                                               | New forms of economies (e.g., sharing economy or silver economy)<br>The increasing role of perceptions and soft factors<br>Diverse working models: part-time and self-employment, home working                                                                                                                                                                                                                                                                                                                                                          | New forms of lifestyles arise that might lead to immigration in rural areas<br>New forms of remote work models might lead to immigration in rural areas<br>New forms of economy make rural areas more attractive or might lead to new economic opportunities                                                                                                                                                     |
|------------------------------------------------------------------------------------------------|--------------------------------------------------------------------------------------------------------------------------------------------------------------------------------------------------------------------------|---------------------------------------------------------------------------------------------------------------------------------------------------------------------------------------------------------------------------------------------------------------------------------------------------------------------------------------------------------------------------------------------------------------------------------------------------------------------------------------------------------------------------------------------------------|------------------------------------------------------------------------------------------------------------------------------------------------------------------------------------------------------------------------------------------------------------------------------------------------------------------------------------------------------------------------------------------------------------------|
| <b>Trends and Drivers Regarding Policy and Socio-Economic Developments in Rural Areas (71)</b> |                                                                                                                                                                                                                          |                                                                                                                                                                                                                                                                                                                                                                                                                                                                                                                                                         |                                                                                                                                                                                                                                                                                                                                                                                                                  |
| <b>Trend<br/>(Type/Number of Observations)</b>                                                 | <b>Main Drivers</b>                                                                                                                                                                                                      | <b>General Developments</b>                                                                                                                                                                                                                                                                                                                                                                                                                                                                                                                             | <b>Chances</b>                                                                                                                                                                                                                                                                                                                                                                                                   |
| <b>Future Challenges for governance and policy in the EU (Trend / 16)</b>                      | Governance: protectionist or anti-based policies and actions<br>Regional development: regional inequality and disparity<br>Policy: new geopolitics, rising East Settlement system: urbanization + Economy: globalization | Changing geo-economic and geo-political landscape (the economic influence of the EU decreases while the economic influence of the Asian countries increases)<br>Social and political fragmentation and political instability<br>Conflicts are on the rise again on every geographic level (global policy, resource competition, land use, etc.)<br>Growing preferences in anti-globalization, Eurosceptics and anti-establishment votes                                                                                                                 | Due to the anti-EU votes in rural areas, EU-policy could focus more on remote rural areas to support cohesion to stabilize the EU politically<br>The rising global conflicts could enforce the countries in the EU to restructure their economy and supply chains towards more independence from countries outside Europe, what could help to create jobs in rural areas, especially in the manufacturing sector |
| <b>Policy incidence and effectiveness (Trend / 16)</b>                                         | Governance: new governance modes and models<br>Policy: Common Agricultural Policy (CAP)<br>Farms: farming traditions<br>Policy: European integration vs. Disintegration                                                  | Weak influence of CAP, because of the strong influence of international markets<br>Ineffective EU Programs (complex requirement regarding CAP promotion, only support of existing farmers, access to land for new farmers is difficult, slow reactions of the EU)<br>Rising attendance of policies on sustainability                                                                                                                                                                                                                                    | Some of the targeted measures of the CAP are helpful for generational renewal in agriculture<br>The rising attendance on sustainability provides the opportunity for rural innovations<br>It is clear that new policy approaches are necessary, which leads to discussion of new solution in rural areas                                                                                                         |
| <b>Socioeconomic developments in agricultural rural societies (Trend / 16)</b>                 | Values: ecological awareness<br>Lifestyle: diversification of lifestyles<br>Diver's structure of drivers from several domains                                                                                            | Rising relevance of agro-tourism with several positive and negative side-effects (increase of relevance of sustainable farming, advantages for regions with potentials in cultural heritage, dependence of some rural regions from agriculture, etc.)<br>Increasing land fragmentation and decentralization<br>Bad influence of current economic developments on rural areas (land-abandonment, degradation, increasing artificial land use, pollution, social marginalization, etc.)<br>Increase of demonstration activities of the farming population | Economic potential of sustainable and agro-tourism as economic chance for rural areas<br>Increasing awareness of the rural population towards changing socioeconomic conditions in rural areas                                                                                                                                                                                                                   |
| <b>Regional and local strategies (Trend / 9)</b>                                               | Economy: localism, local paradigm<br>Economy: globalization domain Policy and Governance                                                                                                                                 | Processes of "glocalisation" can be observed (think global act local)<br>Increasing role of local and regional arrangements<br>Shift from national to local governance                                                                                                                                                                                                                                                                                                                                                                                  | Agriculture policy goes towards more societal challenges (e.g., ecological topics, public goods, sustainability, rural)<br>Arising new local surviving strategies help rural economies (e.g., regional brands, tourism, organic farming, renaturation)<br>Local strategies empower local individuals what can help to work against rural decline                                                                 |

|                                                   |                                                                                                                          |                                                                                                                                                                                                                                                                                                                                                                                  |                                                                                                                                                                                                                                                                                                         |
|---------------------------------------------------|--------------------------------------------------------------------------------------------------------------------------|----------------------------------------------------------------------------------------------------------------------------------------------------------------------------------------------------------------------------------------------------------------------------------------------------------------------------------------------------------------------------------|---------------------------------------------------------------------------------------------------------------------------------------------------------------------------------------------------------------------------------------------------------------------------------------------------------|
| <b>Social innovations and capital (Trend / 9)</b> | Values: social awareness<br>Policy: local policy and issues of the participation society domain<br>Policy and Governance | Social innovations are increasingly important in rural development and agricultural initiatives<br>Increasing social initiatives and innovative networks in rural areas need more local policy support and social capital<br>Social enterprises suffer from a lack of education in marginalized rural areas<br>Rural areas getting more important for wealthy retired households | If social capital and local policymakers can be mobilized, social innovation can have a relevant impact on a rural regeneration<br>Education initiatives in rural areas could help to create social capital for development purpose<br>Economic potential of wealthy retired households for rural areas |
| <b>Regulation and subsidies (Trend / 5)</b>       | Policy: Common Agricultural Policy (CAP)<br>Governance: new governance modes and models<br>Economy: neoliberalism        | Less EU-funding, possible reduction of agricultural subsidies through a more open world economy<br>Strong dependence of the rural economy to the regulatory framework<br>Subsidies has bad influence on Cooperative structure                                                                                                                                                    | The high relevance of the EU-subsidies can be seen as a chance to change rural economies through political engagement<br>A change in policy could help rural economies to be more independent from the regulatory framework                                                                             |

#### Trends and Drivers Regarding Demography, Settlement System and Migration (61)

| Trend (Type/Number of Observations)                                       | Main Drivers                                                                                                                       | General Developments                                                                                                                                                                                                                                                                                                                                                                                                                                            | Chances                                                                                                                                                                                                                                                                                                                                                                           |
|---------------------------------------------------------------------------|------------------------------------------------------------------------------------------------------------------------------------|-----------------------------------------------------------------------------------------------------------------------------------------------------------------------------------------------------------------------------------------------------------------------------------------------------------------------------------------------------------------------------------------------------------------------------------------------------------------|-----------------------------------------------------------------------------------------------------------------------------------------------------------------------------------------------------------------------------------------------------------------------------------------------------------------------------------------------------------------------------------|
| <b>Migration patterns (Megatrend / 20)</b>                                | Lifestyle: liberal lifestyle<br>Mobility and traffic: increasing traffic and mobility<br>Regional development: rural decline       | Selective job-related out-migration from rural to urban regions particularly of younger and well-educated workers<br>There is a potential of Immigrants for rural areas in the EU, but they can hardly profit from it, because immigrants prefer urban areas as well as a lack of acceptance of the rural inhabitants<br>East / West division in the EU: mostly rural areas in western European Countries profit from migration flows from urban to rural areas | Rural regions could profit from immigration in the EU, if those areas produce more incentives<br>Rural regions, which are affected from population decline, could function as role models for a shrinking and more sustainable economy, which is more resilient against environmental issues                                                                                      |
| <b>Concentration and Urbanization (Megatrend / 14)</b>                    | Economy: globalization<br>Economy: market liberalization<br>Lifestyle: diversification of lifestyles<br>Technology: digitalization | Urbanization and growing metropolitan areas as one megatrend that effects every area<br>Increasing concentration of population and economic activities                                                                                                                                                                                                                                                                                                          | In the EU there is already a high level of urbanization reached, so this trend might stop or oppose in the future in favor to rural areas<br>Cities are getting more and more dense and expensive, which could make rural areas more attractive on the long run, because the quality of life in cities decline                                                                    |
| <b>Increasing urban sprawl and urban-rural continuum (Megatrend / 14)</b> | Economy: globalization<br>Settlement system: urbanization<br>Settlement system: urban sprawl, suburbanization, decentralization    | Increasing urban sprawl and suburbanization<br>Multi-Locality and changing housing preferences<br>Blurring borders between urban, intermediate and rural areas                                                                                                                                                                                                                                                                                                  | Especially rural areas close to cities and metropolitan areas might profit demographically and economically from urban sprawl<br>Increasing urban sprawl might lead to a reorientation towards rural spaces of specific lifestyle groups                                                                                                                                          |
| <b>Aging population (Megatrend / 13)</b>                                  | Demographics: demographic change<br>Economy: globalization                                                                         | Increasing life expectancy<br>Global aging society that leads to aging population in all areas<br>Demographic change                                                                                                                                                                                                                                                                                                                                            | Establishing new forms of economies that adapt to the demographic change (e.g., silver economy or health tourism)<br>Rural regions, which are affected from population and economic decline that found solutions to maintain good functionality, could function as role models for a shrinking and more sustainable economy, which is more resilient against environmental issues |

| Trends and Drivers Regarding Environment, Sustainability and Resilience (53) |                                                                                                                                                                 |                                                                                                                                                                                                                                                                                                                                                                        |                                                                                                                                                                                                                                                                                                                                                                                                            |
|------------------------------------------------------------------------------|-----------------------------------------------------------------------------------------------------------------------------------------------------------------|------------------------------------------------------------------------------------------------------------------------------------------------------------------------------------------------------------------------------------------------------------------------------------------------------------------------------------------------------------------------|------------------------------------------------------------------------------------------------------------------------------------------------------------------------------------------------------------------------------------------------------------------------------------------------------------------------------------------------------------------------------------------------------------|
| Trend<br>(Type/Number of<br>Observations)                                    | Main Drivers                                                                                                                                                    | General Developments                                                                                                                                                                                                                                                                                                                                                   | Chances                                                                                                                                                                                                                                                                                                                                                                                                    |
| <b>Sustainability transition and Resilience (Megatrend / 17)</b>             | Values:<br>ecological awareness<br>Environment:<br>climate change environmental degradation, pollution and risks                                                | Rising importance of resilience, due to climate change and environmental problems<br>Increasing relevance of sustainability in rural areas (e.g., water and nutrient management, farming at landscape scale, soil management in livestock production, cereal cultivation)<br>Rising demand on sustainable methods on food production and services for the local market | The transition towards increased sustainability in agriculture are important for government, NGOs and research institutions, what can help to evolve a sustainable rural regeneration<br>Sustainable water and nutrient management and the rising significance of green technology are potentials for rural economies to grow<br>Circular bio-economy will be an opportunity for rural areas               |
| <b>Shift towards a sustainable and renewable economy (Megatrend / 15)</b>    | Values:<br>ecological awareness<br>Environment:<br>climate change<br>Policy: agro-environmental and environmental policies                                      | Shift towards renewable energy and products (increasing share of renewable energy)<br>Peak of everything (Fossil economy)<br>Transition towards a circular economy<br>Decarbonization of industrial activities                                                                                                                                                         | Circular economy as one main issue for agro-food businesses in Europe<br>New market for the production of biofuels and renewable energy in rural areas<br>Increasing ecological awareness and slow growth lifestyles can push rural areas socio-economically                                                                                                                                               |
| <b>(Agro-) Environmental conservation (Trend / 12)</b>                       | Values:<br>ecological awareness<br>Values: social awareness<br>Environment:<br>climate change<br>Environment:<br>environmental degradation, pollution and risks | Increasing of environmental issues and public awareness regarding to agricultural holdings<br>Consumer's awareness of food production processes is increasing, as well as their concern about diets and food choices<br>Conservation of the environment and natural resources are getting more and more part of Agronomics                                             | Manifestation of environmental policies due to agricultural policies<br>Regions with rural tourism have potential for environmental conservation<br>The increase of ecological awareness has the potential to increase the value of agricultural products, therefore the income of farmers and the rural inhabitants might increase as well                                                                |
| <b>(Awareness on) Increasing environmental impacts (Trend / 9)</b>           | Values:<br>ecological awareness<br>Values: social awareness<br>Economy:<br>globalization<br>Environment:<br>environmental degradation, pollution and risks      | Natural environment and ecosystems are under increasing stress<br>Loss of biodiversity, as well as habitat destruction<br>Ecological status of surface water depends on the land use                                                                                                                                                                                   | An increasing awareness of the negative social, cultural, economic, health and environmental side effects of spatially extended (and in particular global) food chains has emerged<br>A trend of concepts can be observed that allows animals to act in their natural behavior<br>Sustainable engagement might be chance for some rural areas to get more attractive and depend less on the primary sector |
| Trends and Drivers Regarding the Food System (41)                            |                                                                                                                                                                 |                                                                                                                                                                                                                                                                                                                                                                        |                                                                                                                                                                                                                                                                                                                                                                                                            |
| Trend<br>(Type/Number of<br>Observations)                                    | Main Drivers                                                                                                                                                    | General Developments                                                                                                                                                                                                                                                                                                                                                   | Chances                                                                                                                                                                                                                                                                                                                                                                                                    |
| <b>Regional and local food (Trend / 22)</b>                                  | Values:<br>ecological awareness<br>Values: social awareness<br>Lifestyle:<br>diversification of lifestyles                                                      | Growing number of small-scale producers on the local level<br>Increasing regional marketing of food production<br>Shorter value chains between producer and consumer<br>Growing organic food production<br>Rising importance of Alternative Food Networks (AAFNs)                                                                                                      | Short food supply chains are important for the success of new entrants' businesses because of the opportunity to establish on-farm shops, farmers' markets, box schemes, and online food assemblies, but also use short chains to supply local cafés and restaurants<br>Local and regional distribution networks of agricultural products can help to attract new entrants                                 |

into farming, because larger profit margins can be expected

|                                               |             |                                                                                                                                                                   |                                                                                                                                                                                                                                                                                                                                                                                                      |                                                                                                                                                                                                                                                                                                                                                                    |
|-----------------------------------------------|-------------|-------------------------------------------------------------------------------------------------------------------------------------------------------------------|------------------------------------------------------------------------------------------------------------------------------------------------------------------------------------------------------------------------------------------------------------------------------------------------------------------------------------------------------------------------------------------------------|--------------------------------------------------------------------------------------------------------------------------------------------------------------------------------------------------------------------------------------------------------------------------------------------------------------------------------------------------------------------|
| <b>Sustainable and lifestyle (Trend / 13)</b> | <b>food</b> | <p>Values: ecological awareness</p> <p>Values: social awareness</p> <p>Lifestyle: diversification of lifestyles</p> <p>Health: changing health-related trends</p> | <p>Increasing societal demands for local organic food and biodiversity friendly agriculture</p> <p>Growing consumer demand for healthy food</p> <p>Increasing use of the countryside as a space of consumption</p> <p>Increasing awareness and responsibility of consumers about their food and more stringent environmental regulations → Sustainable food (supply chains) are a growing market</p> | <p>Rural areas where a sustainable lifestyle can be provided could benefit from the immigration of specific lifestyle groups</p> <p>The growing market for sustainable food has the potential to increase profit margins for agricultural products</p> <p>Consumption countryside's have the potential to harvest the increasing sector of sustainable tourism</p> |
| <b>Food demand and security (Trend / 6)</b>   |             | <p>Economy: globalization</p> <p>Economy: market liberalization</p>                                                                                               | <p>Increase global food production</p> <p>Food losses and waste</p> <p>Unsafe food remains a major cause of disease and death</p> <p>Dependency on China in terms of food production supply chains</p>                                                                                                                                                                                               | <p>Governance for food and nutrition security ('Good governance' has given way to more pragmatic, problem-driven decision-making)</p> <p>Potential for local food production chains if governance would enforce the shift from global to regional or local supply chains</p>                                                                                       |
